# Supplementary material for: A gel lattice alters the phase state of a solvent
Source: Royal Society of Chemistry journal article supplement (doi:10.1039/d2sm00767c), 2022-01-01
Supplement: d2sm00767c1.pdf [file d2sm00767c1.pdf]

Cite this: DOI: 00.0000/xxxxxxxxxx

## Gel Lattice Alters the Phase State of the Solvent

Sergey V. Stovbun,<sup>a</sup> Alexey A. Skoblin,<sup>a</sup> Natalia G. Shilkina,<sup>a</sup> Sergey M. Lomakin <sup>a,b</sup> and Dmitry V. Zlenko<sup>a,c,d,\*</sup>

Received Date

Accepted Date

DOI: 00.0000/xxxxxxxxxx

Some low-molecular-weight substances are able to self-assemble into the fiber-like structures (strings) to form gels. One of the examples of such substances is trifluoroacetylated *alpha*-aminoalcohols (TFAAAs) able of gelation of many organic solvents. Here we report formation and describe the properties of a layer of an altered solvent covering the strings' surface. The altered solvent layer has a different refractive index and melts at a temperature about several degrees lower than the bulk solvent. Moreover, the bulk solvent's melting temperature was also depressed by values far beyond the one expected according to Raoult's law. Based on the Gibbs–Thomson equation it is possible to derive the thickness of the special layer as well as the average gel lattice parameters, which were very stable across the variety of the systems investigated.

### Supplementary materials

<sup>a</sup> N.N. Semenov Institute of Chemical Physics, RAS, 119334, Kosygina 4/1, Moscow, Russia.

<sup>b</sup> N.M. Emanuel Institute of Biochemical Physics, RAS, 119334, Kosygina 4, Moscow, Russia

<sup>c</sup> M.V. Lomonosov Moscow State University, faculty of Biology, 119234, Lenin Hills 1/24, Moscow, Russia.

<sup>d</sup> A.N. Severtson Institute of Ecology and Evolution, 119071, Lenin Avenue, 33, Moscow, Russia.

\* dvzlenko@gmail.com

Table S1 The experimental data on the phase transition temperatures (K) / enthalpies (J/g) for TFAAA solutions in heptane.  $T_{fH}$  – fusion temperature,  $T_{cH}$  – crystallization temperature.  $T'_{fH}$  and  $T'_{cH}$  — denote the position of the satellite peaks below  $T_f$  and  $T_c$ .

| C, mg/ml     | $T_{cH}$                   | $T'_{cH}$     | $T_{fH}$                    | $T'_{fH}$      |                |
|--------------|----------------------------|---------------|-----------------------------|----------------|----------------|
| Pure Heptane | 175.0 ± 0.3<br>117.8 ± 0.5 | –             | 185.1 ± 0.4<br>–129.5 ± 1.6 | –              |                |
| TFAAA-4      | 0.10                       | 175.1 / 104.9 | 166.4 / 2.2                 | 184.4 / –111.6 | 174.4 / –6.0   |
|              | 0.10                       | 175.7 / 106.2 | 166.4 / 2.4                 | 184.3 / –110.7 | 175.0 / –8.1   |
|              | 0.40                       | 174.0 / 104.9 | 168.7 / 8.2                 | 183.4 / –103.8 | 175.3 / –21.1  |
|              | 0.40                       | 174.4 / 106.5 | 168.7 / 7.9                 | 183.4 / –99.0  | 175.4 / –21.0  |
|              | 1.0                        | 173.7 / 102.1 | 168.6 / 11.0                | 183.2 / –102.0 | 175.5 / –21.4  |
|              | 1.0                        | 173.5 / 100.0 | 168.3 / 10.8                | 183.2 / –99.4  | 175.5 / –21.9  |
|              | mean                       | 174.3 ± 0.8   | 167.8 ± 1.0                 | 183.6 ± 0.5    | 175.1 ± 0.4    |
| TFAAA-5      | 0.05                       | 174.1 / 120.3 | 167.7 / 5.4                 | 183.6 / –124.3 | 174.8 / –13.6  |
|              | 0.05                       | 173.5 / 113.5 | 167.8 / 5.1                 | 183.5 / –117.5 | 174.8 / –13.7  |
|              | 0.20                       | 175.1 / 113.3 | 165.7 / 1.8                 | 184.6 / –120.1 | 175.0 / –5.9   |
|              | 0.20                       | 174.6 / 115.9 | 165.9 / 1.8                 | 184.2 / –122.2 | 174.8 / –6.1   |
|              | 1.0                        | 175.7 / 103.7 | 167.4 / 4.0                 | 183.8 / –108.1 | 174.8 / –10.2  |
|              | 1.0                        | 175.5 / 111.3 | 167.4 / 4.3                 | 183.8 / –115.6 | 174.9 / –11.2  |
|              | mean                       | 174.8 ± 0.7   | 166.9 ± 0.8                 | 183.8 ± 0.4    | 174.7 ± 0.3    |
| TFAAA-6      | 0.05                       | 174.1 / 110.0 | 167.9 / 4.8                 | 183.4 / –116.5 | 174.7 / –12.7  |
|              | 0.05                       | 173.8 / 107.1 | 167.9 / 5.2                 | 183.5 / –111.8 | 174.8 / –13.0  |
|              | 0.20                       | 174.1 / 98.8  | 168.1 / 4.4                 | 183.1 / –101.4 | 174.5 / –10.1  |
|              | 0.20                       | 173.9 / 108.0 | 168.0 / 5.3                 | 183.3 / –111.4 | 174.7 / –13.12 |
|              | 1.0                        | 174.7 / 106.8 | 168.1 / 5.8                 | 183.6 / –110.4 | 174.1 / –15.6  |
|              | 1.0                        | 174.8 / 125.0 | 168.2 / 6.8                 | 183.5 / –129.4 | 174.9 / –16.7  |
|              | mean                       | 174.2 ± 0.4   | 168.0 ± 0.1                 | 183.3 ± 0.2    | 174.7 ± 0.2    |
| TFAAA-7      | 0.005                      | 171.9 / 85.9  | 169.0 / 24.1                | 181.2 / –72.6  | 175.4 / –45.9  |
|              | 0.005                      | 170.8 / 83.7  | 168.5 / 25.0                | 181.3 / –69.8  | 175.6 / –49.5  |
|              | 0.03                       | 170.1 / 64.9  | 168.7 / 41.5                | 179.7 / –45.6  | 175.9 / –69.8  |
|              | 0.03                       | 171.6 / 67.1  | 168.7 / 39.6                | 179.9 / –45.7  | 176.3 / –71.0  |
|              | 1.0                        | 172.1 / 69.2  | 168.9 / 40.5                | 180.1 / –43.9  | 176.5 / –74.4  |
|              | 1.0                        | 171.6 / 68.8  | 169.1 / 35.9                | 180.0 / –45.4  | 176.2 / –68.2  |
|              | mean                       | 171.3 ± 0.7   | 168.8 ± 0.2                 | 180.3 ± 0.6    | 175.9 ± 0.4    |
|              | 73.3 ± 8.3                 | 34.4 ± 7.2    | –53.8 ± 12.3                | –63.1 ± 11.1   |                |

Table S2 The experimental data on the phase transition temperatures (K) / enthalpies (J/g) for TFAAA solutions in cyclohexane.  $T_{fC}$  – fusion temperature,  $T_{cC}$  — crystallization temperature,  $T_{I/II}$  -- temperature of I→II phase transition, and  $T_{II/I}$  — temperature of II→I phase transition.  $T'_{I/II}$  and  $T'_{II/I}$  – denote the position of the satellite peaks below the I↔II transition temperature ( $T_2$ ).

| C, mg/ml    | $T_{cC}$        | $T_{fC}$        | $T_{I/II}$       | $T'_{I/II}$     | $T_{II/I}$      | $T'_{II/I}$     |                 |
|-------------|-----------------|-----------------|------------------|-----------------|-----------------|-----------------|-----------------|
| Cyclohexane | $276.8 \pm 0.9$ | $279.8 \pm 0.5$ | $180.0 \pm 0.5$  | –               | $187.7 \pm 0.7$ | –               |                 |
|             | $28.5 \pm 2.1$  | $-28.6 \pm 1.6$ | $64.9 \pm 1.4$   |                 | $-70.4 \pm 0.9$ |                 |                 |
| TFAAA-4     | 0.20            | $275.3 / 29.2$  | $278.1 / -28.0$  | $181.4 / 73.8$  | $167.5 / 0.5$   | $188.2 / -80.5$ | $174.3 / -0.4$  |
|             | 1.0             | $273.7 / 24.1$  | $277.7 / -22.5$  | $181.0 / 65.2$  | $167.8 / 2.2$   | $188.1 / -70.8$ | $174.3 / -1.6$  |
|             | 2.0             | $261.6 / 11.7$  | $268.8 / -1.7$   | $181.7 / 47.1$  | $169.5 / 6.1$   | $188.1 / -57.6$ | $175.2 / -7.3$  |
|             | mean            | $270.2 \pm 6.1$ | $274.9 \pm 4.3$  | $181.3 \pm 0.3$ | $168.2 \pm 0.9$ | $188.1 \pm 0.0$ | $174.5 \pm 0.4$ |
|             |                 | $12.7 \pm 7.3$  | $-17.4 \pm 11.3$ | $62.0 \pm 11.1$ | $2.9 \pm 2.3$   | $-69.6 \pm 9.4$ | $-3.1 \pm 3.0$  |
| TFAAA-5     | 0.10            | $244.1 / 5.4$   | $253.7 / -0.7$   | $178.4 / 52.8$  | $169.4 / 18.2$  | $188.0 / -50.3$ | $175.6 / -20.6$ |
|             | 0.5             | $276.3 / 31.9$  | $279.2 / -32.6$  | $181.7 / 54.6$  | $169.5 / 7.6$   | $188.2 / -67.2$ | $175.2 / -8.7$  |
|             | 1.0             | $264.3 / 11.0$  | $267.3 / -2.1$   | $181.6 / 53.1$  | $169.7 / 8.4$   | $188.3 / -65.0$ | $175.3 / -9.4$  |
|             | mean            | $257.8 \pm 9.8$ | $266.7 \pm 10.4$ | $180.5 \pm 1.5$ | $169.5 \pm 0.1$ | $188.1 \pm 0.1$ | $175.3 \pm 0.2$ |
|             |                 | $9.2 \pm 2.7$   | $-11.8 \pm 14.7$ | $53.5 \pm 0.8$  | $11.4 \pm 4.8$  | $-60.9 \pm 7.5$ | $-12.9 \pm 5.5$ |
| TFAAA-6     | 0.20            | $260.6 / 12.2$  | $265.7 / -1.6$   | $181.3 / 53.2$  | $169.7 / 9.0$   | $188.3 / -64.3$ | $175.2 / -10.4$ |
|             | 1.0             | $262.8 / 11.4$  | $267.0 / -1.7$   | $181.5 / 54.0$  | $169.7 / 7.9$   | $188.1 / -66.4$ | $175.1 / -9.2$  |
|             | 2.0             | $263.8 / 13.1$  | $267.9 / -1.9$   | $181.4 / 54.2$  | $169.7 / 6.9$   | $188.3 / -65.4$ | $175.2 / -8.1$  |
|             | mean            | $262.5 \pm 1.3$ | $267.0 \pm 0.9$  | $181.6 \pm 0.1$ | $169.7 \pm 0.0$ | $188.4 \pm 0.1$ | $175.3 \pm 0.0$ |
|             |                 | $12.2 \pm 0.7$  | $-1.8 \pm 0.1$   | $53.8 \pm 0.4$  | $7.9 \pm 0.9$   | $-65.3 \pm 0.9$ | $-9.2 \pm 0.9$  |
| TFAAA-7     | 0.005           | $259.2 / 12.3$  | $266.1 / -2.3$   | $182.1 / 57.9$  | $169.7 / 9.8$   | $188.2 / -71.2$ | $175.4 / -10.9$ |
|             | 0.005           | $260.6 / 12.9$  | $266.8 / -2.1$   | $181.9 / 58.8$  | $169.6 / 8.9$   | $188.2 / -71.7$ | $175.2 / -10.3$ |
|             | 0.03            | $262.5 / 11.6$  | $267.8 / -1.8$   | $181.5 / 52.7$  | $170.1 / 7.3$   | $188.6 / -64.5$ | $175.4 / -8.9$  |
|             | 1.0             | $260.8 / 9.6$   | $263.9 / -1.3$   | $181.4 / 54.2$  | $170.1 / 11.2$  | $188.2 / -65.4$ | $175.4 / -12.5$ |
|             | mean            | $260.7 \pm 1.2$ | $266.1 \pm 1.4$  | $181.7 \pm 0.3$ | $169.8 \pm 0.2$ | $188.2 \pm 0.2$ | $175.3 \pm 0.1$ |
|             |                 | $11.6 \pm 1.2$  | $-1.9 \pm 0.4$   | $55.9 \pm 2.5$  | $9.3 \pm 1.4$   | $-68.2 \pm 3.3$ | $-10.7 \pm 1.3$ |

Table S3 The Raoult's law estimates on the e"raoult's" TFAAA concentrations ( $C_{eff}$  mg/ml) and Gibbs-Thompson's estimates on the mesophase ( $D_m, \mu\text{m}$ ) and strings ( $D_s, \text{nm}$ ) diameters in heptane and cyclohexane solutions. The last column represents the average spacing between the strings ( $S_s, \mu\text{m}$ ).

|         | C, mg/ml<br>(real) | Heptane     |             |            |            | Cyclohexane |             |            |            |
|---------|--------------------|-------------|-------------|------------|------------|-------------|-------------|------------|------------|
|         |                    | $C_{eff}$   | $D_m$       | $D_s$      | $S_s$      | $C_{eff}$   | $D_m$       | $D_s$      | $S_s$      |
| TFAAA-4 | 0.10               | 690         | 0.72        | 55         | 31         |             |             |            |            |
|         | 0.10               | 690         | 0.67        | 50         | 28         |             |             |            |            |
|         | 0.20               |             |             | –          |            | 8           | 3.5         | 740        | 260        |
|         | 0.40               | 520         | 1.2         | 100        | 27         |             |             |            |            |
|         | 0.40               | 520         | 1.1         | 100        | 26         |             |             |            |            |
|         | 1.0                | 530         | 1.2         | 235        | 24         | 20          | 3.7         | 710        | 125        |
|         | 1.0                | 550         | 1.2         | 230        | 23         |             |             |            |            |
|         | 2.0                |             |             | –          |            | 115         | 4.0         | 720        | 72         |
| mean    | 580 ± 30           | 1.0 ± 0.2   | 130 ± 80    | 26.3 ± 2.5 | 45 ± 45    | 3.7 ± 0.2   | 720 ± 10    | 151 ± 79   |            |
| TFAAA-5 | 0.05               | 480         | 0.98        | 37         | 29         |             |             |            |            |
|         | 0.05               | 470         | 1.1         | 42         | 32         |             |             |            |            |
|         | 0.10               |             |             | –          |            | 205         | 5.5         | 120        | 66         |
|         | 0.20               | 590         | 0.67        | 84         | 32         |             |             |            |            |
|         | 0.20               | 580         | 0.72        | 92         | 36         |             |             |            |            |
|         | 0.50               |             |             | –          |            | 70          | 4.0         | 285        | 70         |
|         | 1.0                | 495         | 0.75        | 135        | 24         | 75          | 4.1         | 550        | 68         |
|         | 1.0                | 495         | 0.77        | 140        | 24         |             |             |            |            |
| mean    | 520 ± 50           | 0.83 ± 0.15 | 90 ± 40     | 29.7 ± 4.1 | 120 ± 60   | 4.53 ± 0.07 | 320 ± 180   | 68.1 ± 1.7 |            |
| TFAAA-6 | 0.05               | 505         | 1.0         | 39         | 30         |             |             |            |            |
|         | 0.05               | 505         | 1.1         | 38         | 30         |             |             |            |            |
|         | 0.20               | 490         | 1.0         | 80         | 31         |             |             |            |            |
|         | 0.20               | 500         | 1.1         | 77         | 30         | 105         | 4.2         | 173        | 67         |
|         | 1.0                | 490         | 0.95        | 204        | 25         | 90          | 4.1         | 404        | 70         |
|         | 1.0                | 485         | 0.96        | 205        | 25         |             |             |            |            |
|         | 2.0                |             |             | –          |            | 85          | 4.1         | 607        | 74         |
|         | mean               | 496 ± 8     | 1.02 ± 0.06 | 105 ± 70   | 29.0 ± 2.5 | 93 ± 8      | 4.17 ± 0.05 | 395 ± 175  | 70.6 ± 3.1 |
| TFAAA-7 | 0.005              | 580         | 2.2         | 10         | 28         | 155         | 3.9         | 29         | 64         |
|         | 0.005              | 620         | 2.7         | 13         | 35         | 145         | 4.0         | 30         | 67         |
|         | 0.03               | 605         | 2.5         | 24         | 44         | 125         | 4.3         | 76         | 76         |
|         | 0.03               | 605         | 2.2         | 23         | 22         |             |             |            |            |
|         | 1.0                | 590         | 1.9         | 114        | 20         | 140         | 4.4         | 370        | 64         |
|         | 1.0                | 570         | 2.5         | 151        | 26         |             |             |            |            |
|         | mean               | 595 ± 15    | 2.6 ± 0.3   | 55 ± 55    | 29.1 ± 8.2 | 140 ± 10    | 4.2 ± 0.2   | 125 ± 140  | 67.9 ± 4.8 |
